# Supplementary material for: Peptide Tat(48–60) YVEEL protects against necrotizing enterocolitis through inhibition of toll-like receptor 4-mediated signaling in a phosphatidylinositol 3-kinase/AKT dependent manner
Source: PubMed Central journal article supplement (PMC9590307; doi:10.3389/fnut.2022.992145), 2022-10-10
Supplement: Data_Sheet_1.pdf [file Data_Sheet_1.pdf]

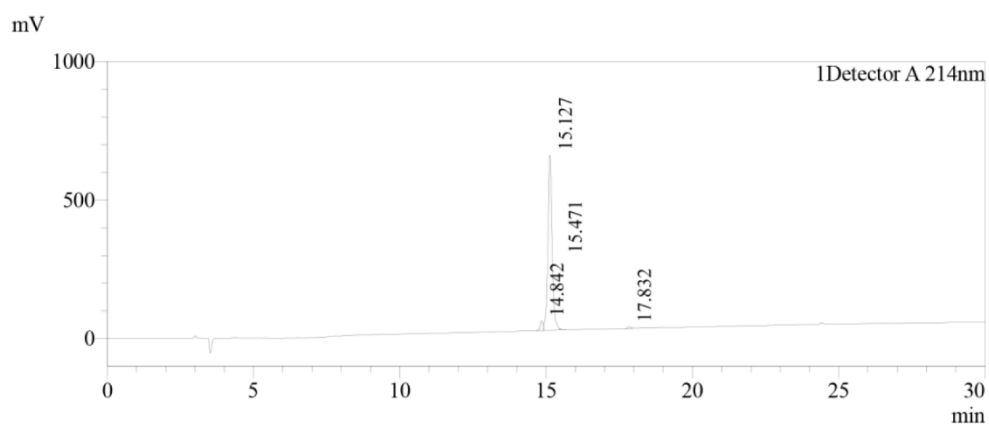

Peak Table

Detector A 214nm

| Peak# | Ret. Time | Area    | Height | Area%   |
|-------|-----------|---------|--------|---------|
| 1     | 14.842    | 231489  | 34905  | 3.518   |
| 2     | 15.127    | 6295154 | 632338 | 95.657  |
| 3     | 15.471    | 14672   | 4017   | 0.223   |
| 4     | 17.832    | 39684   | 6702   | 0.603   |
| Total |           | 6580999 | 677962 | 100.000 |

**Supplementary Figure 1. The HPLC chromatogram of <sup>Tat (48-60)</sup> YVEEL.** The purification yielded a final product with 95.657% purity.
